# Supplementary material
Source: Research Square preprint supplement (doi:10.21203/rs.3.rs-9853529/v1)
Supplement: Supplementary file 1 [file 9029c74222a4d5107a993ab5.docx]

# Supplementary Materials — Bayesian and frequentist meta-analysis of GCB-classification heterogeneity in TP53-reporting DLBCL cohorts at small k

This file accompanies the main manuscript and contains the supplementary figures (S-Figures 1–5), supplementary tables (S-Tables 1–3), and the Stan model code referenced in the main text.

## Section S1. Supplementary Figures

### S-Figure 1. Bootstrap-I² histogram with empirical convergence rate.


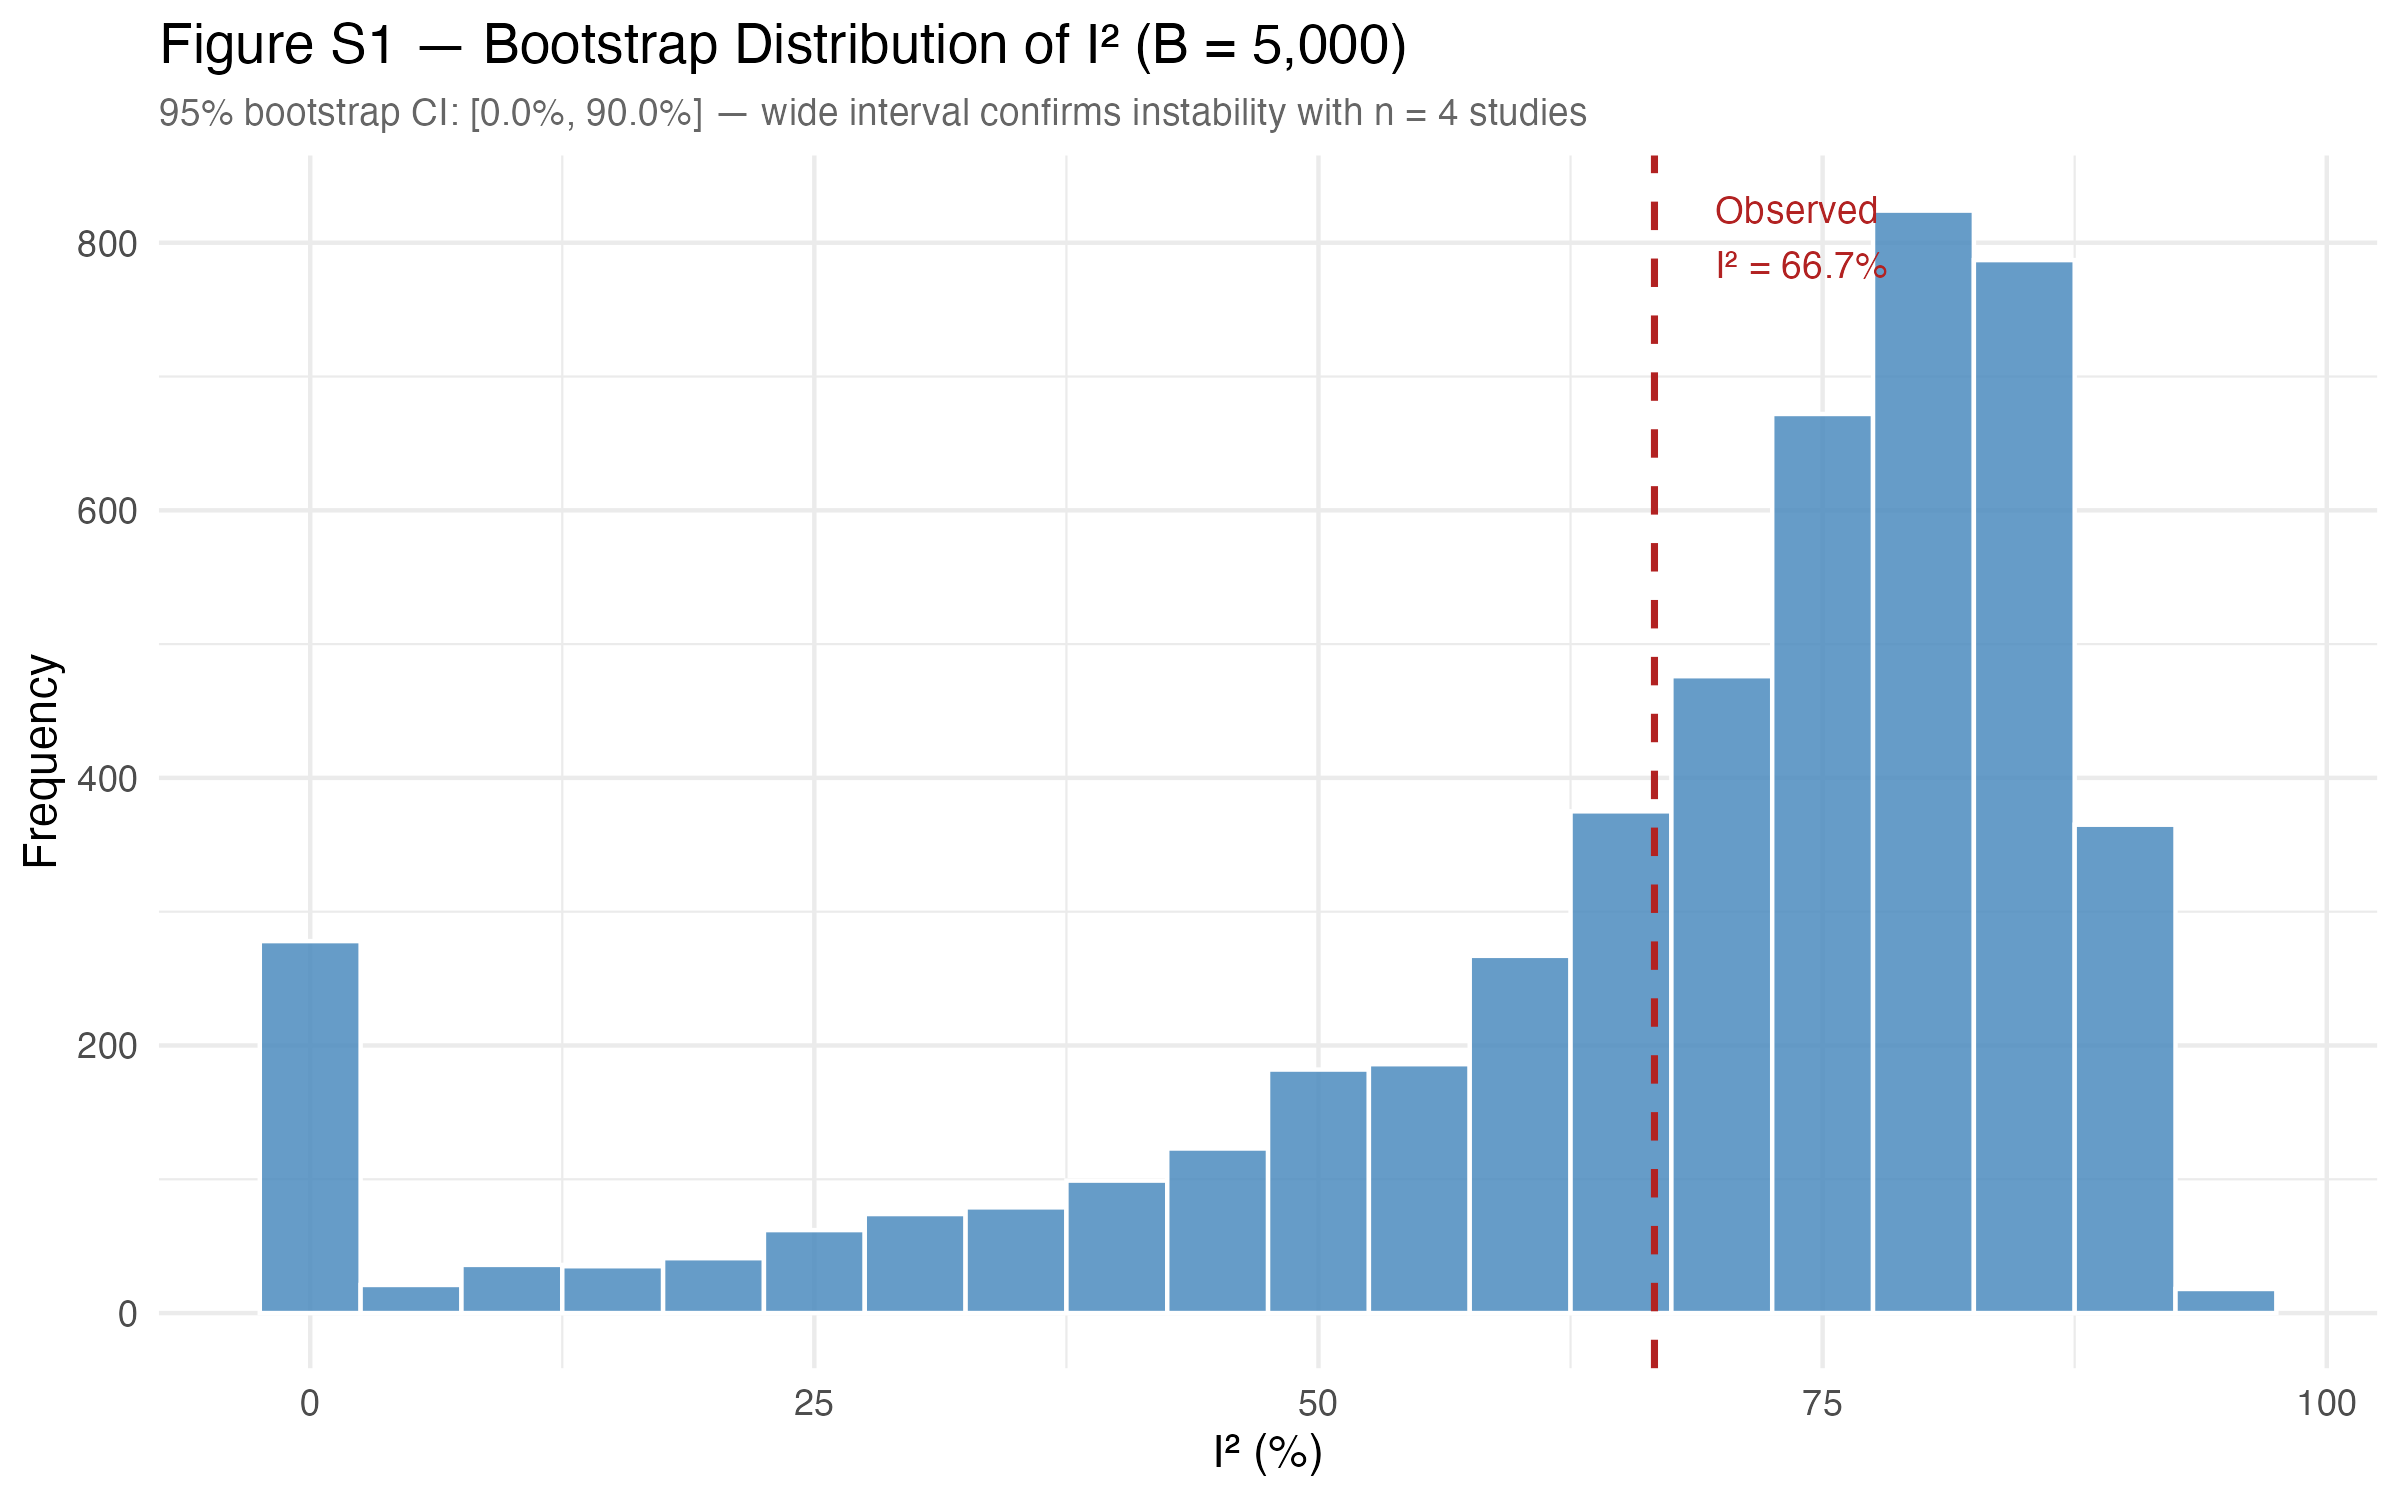


Distribution of I² values across 1,000 non-parametric bootstrap resamples of the k = 5 cohorts. Only the proportion of resamples for which I² is estimable is reported in the main text; the histogram is shown here for completeness.

### S-Figure 2. Bootstrap pooled-proportion histogram.


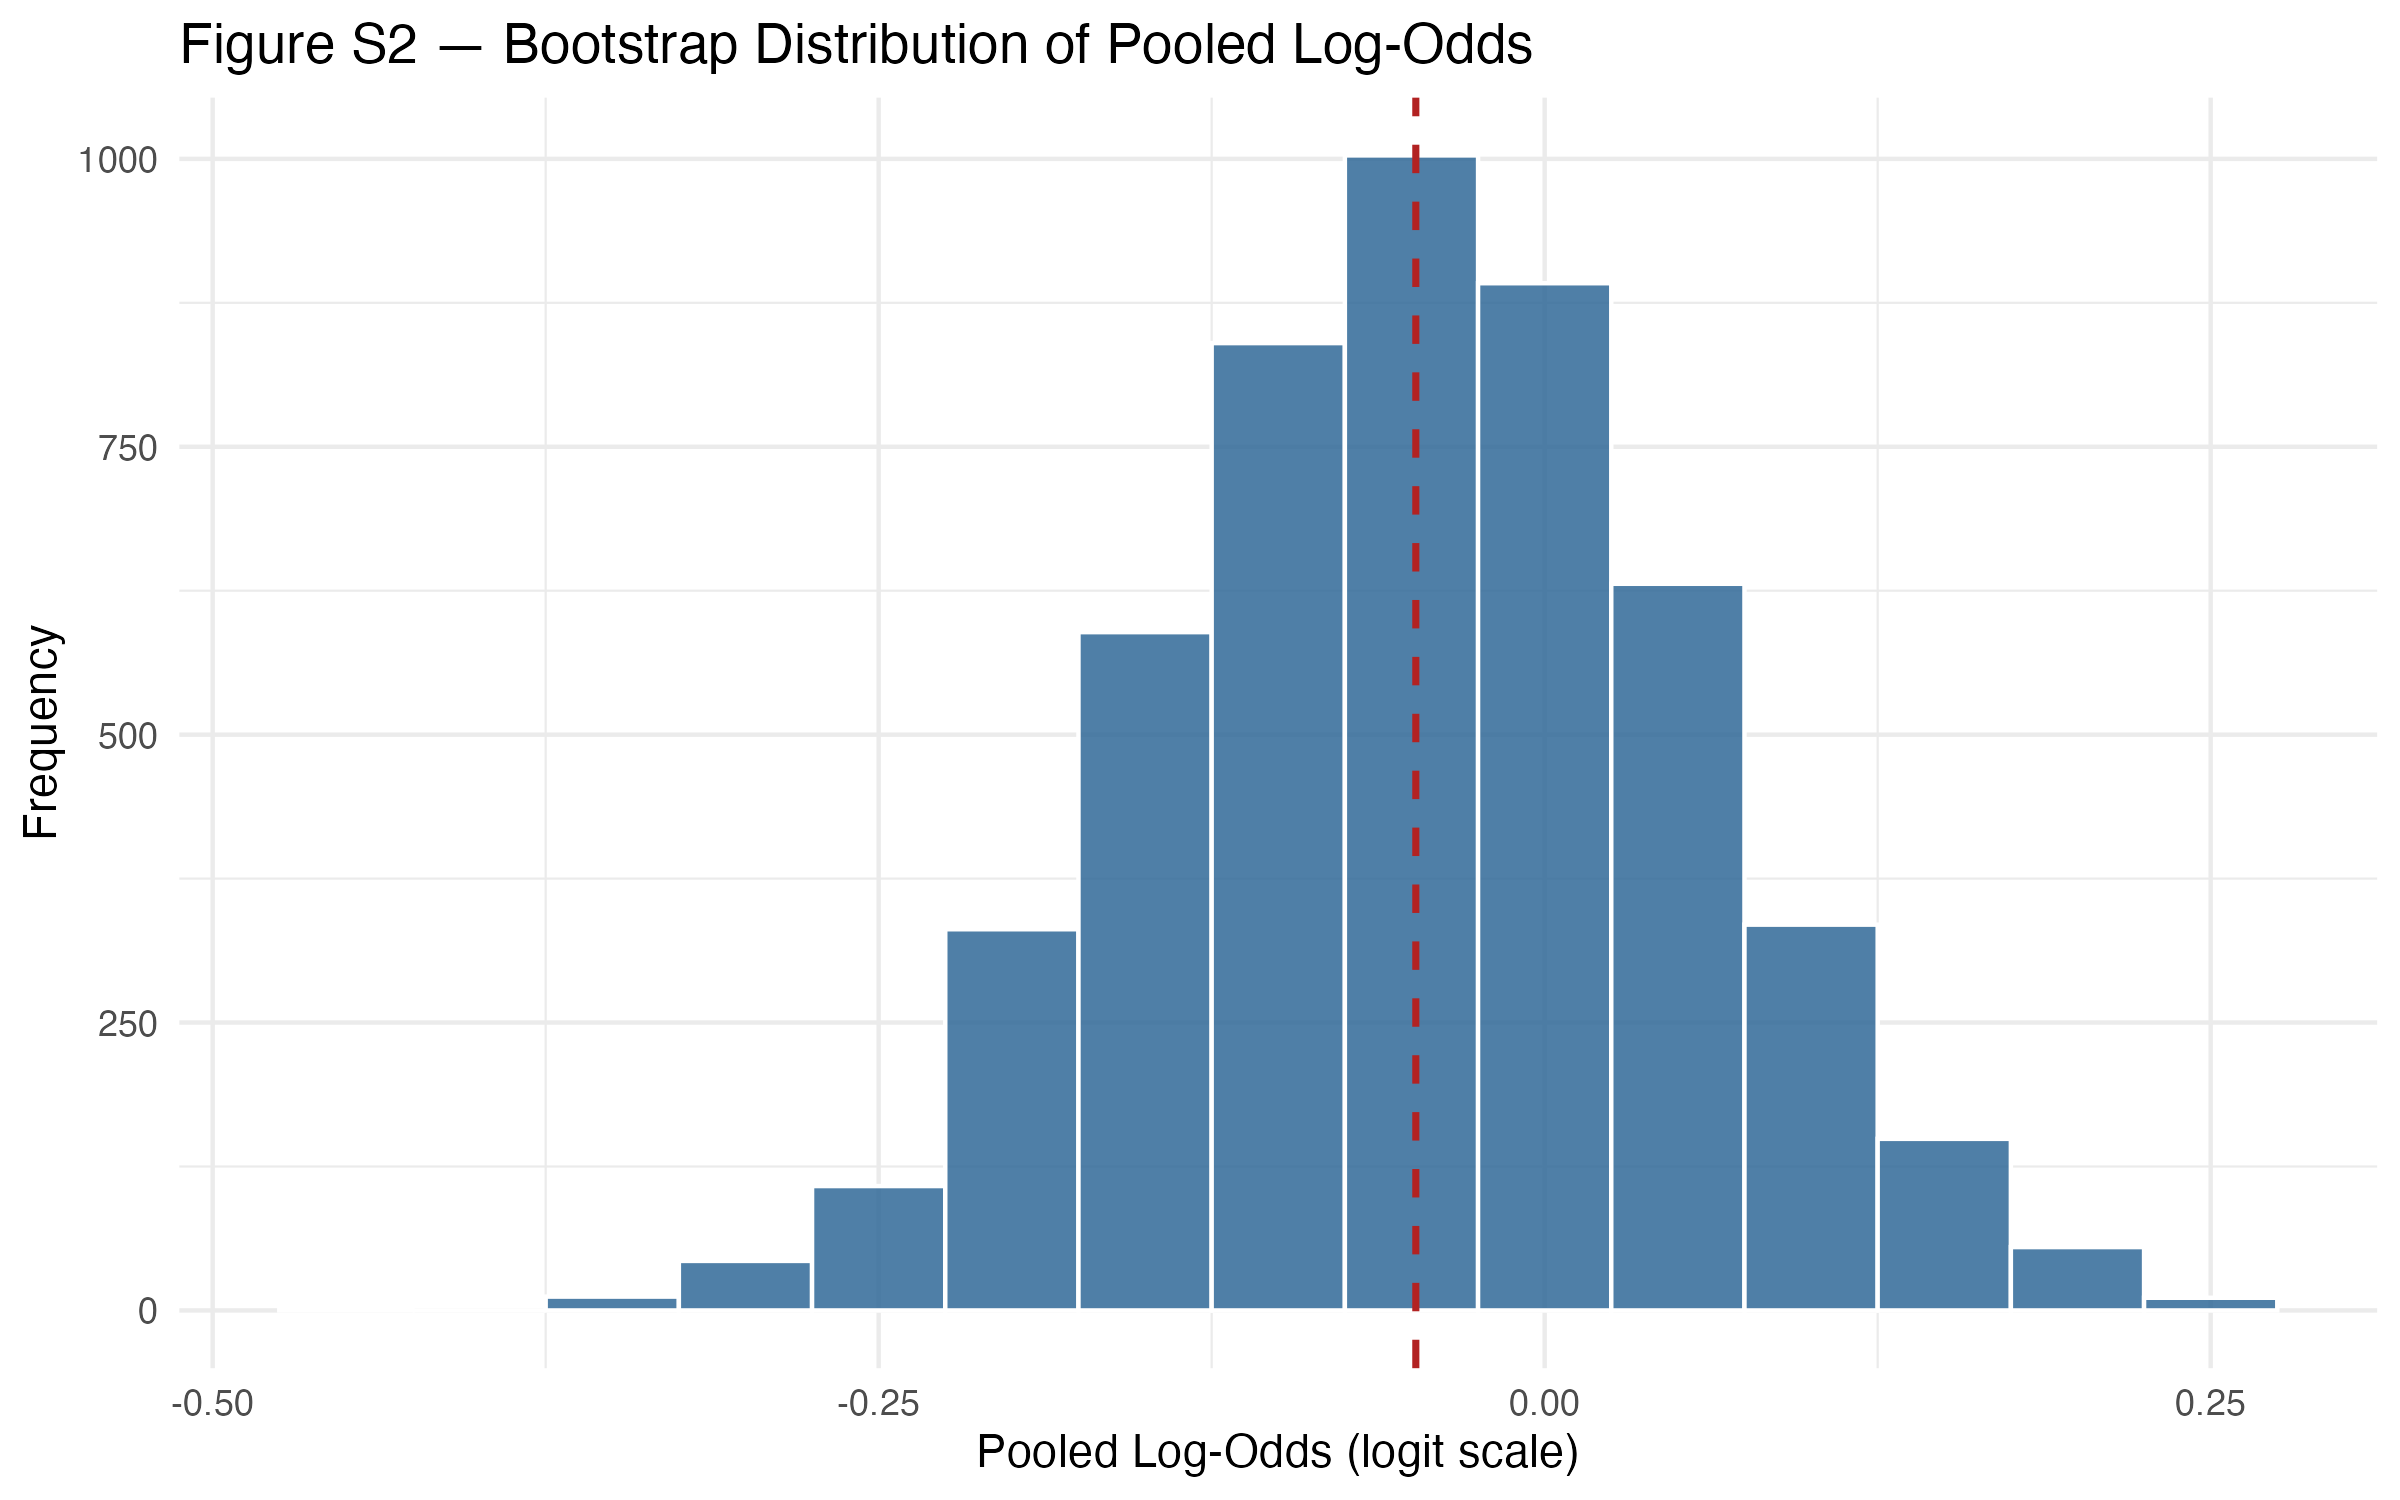


Distribution of the pooled GCB proportion across the same 1,000 bootstrap resamples.

### S-Figure 3. LOO sensitivity of I² by detection method.


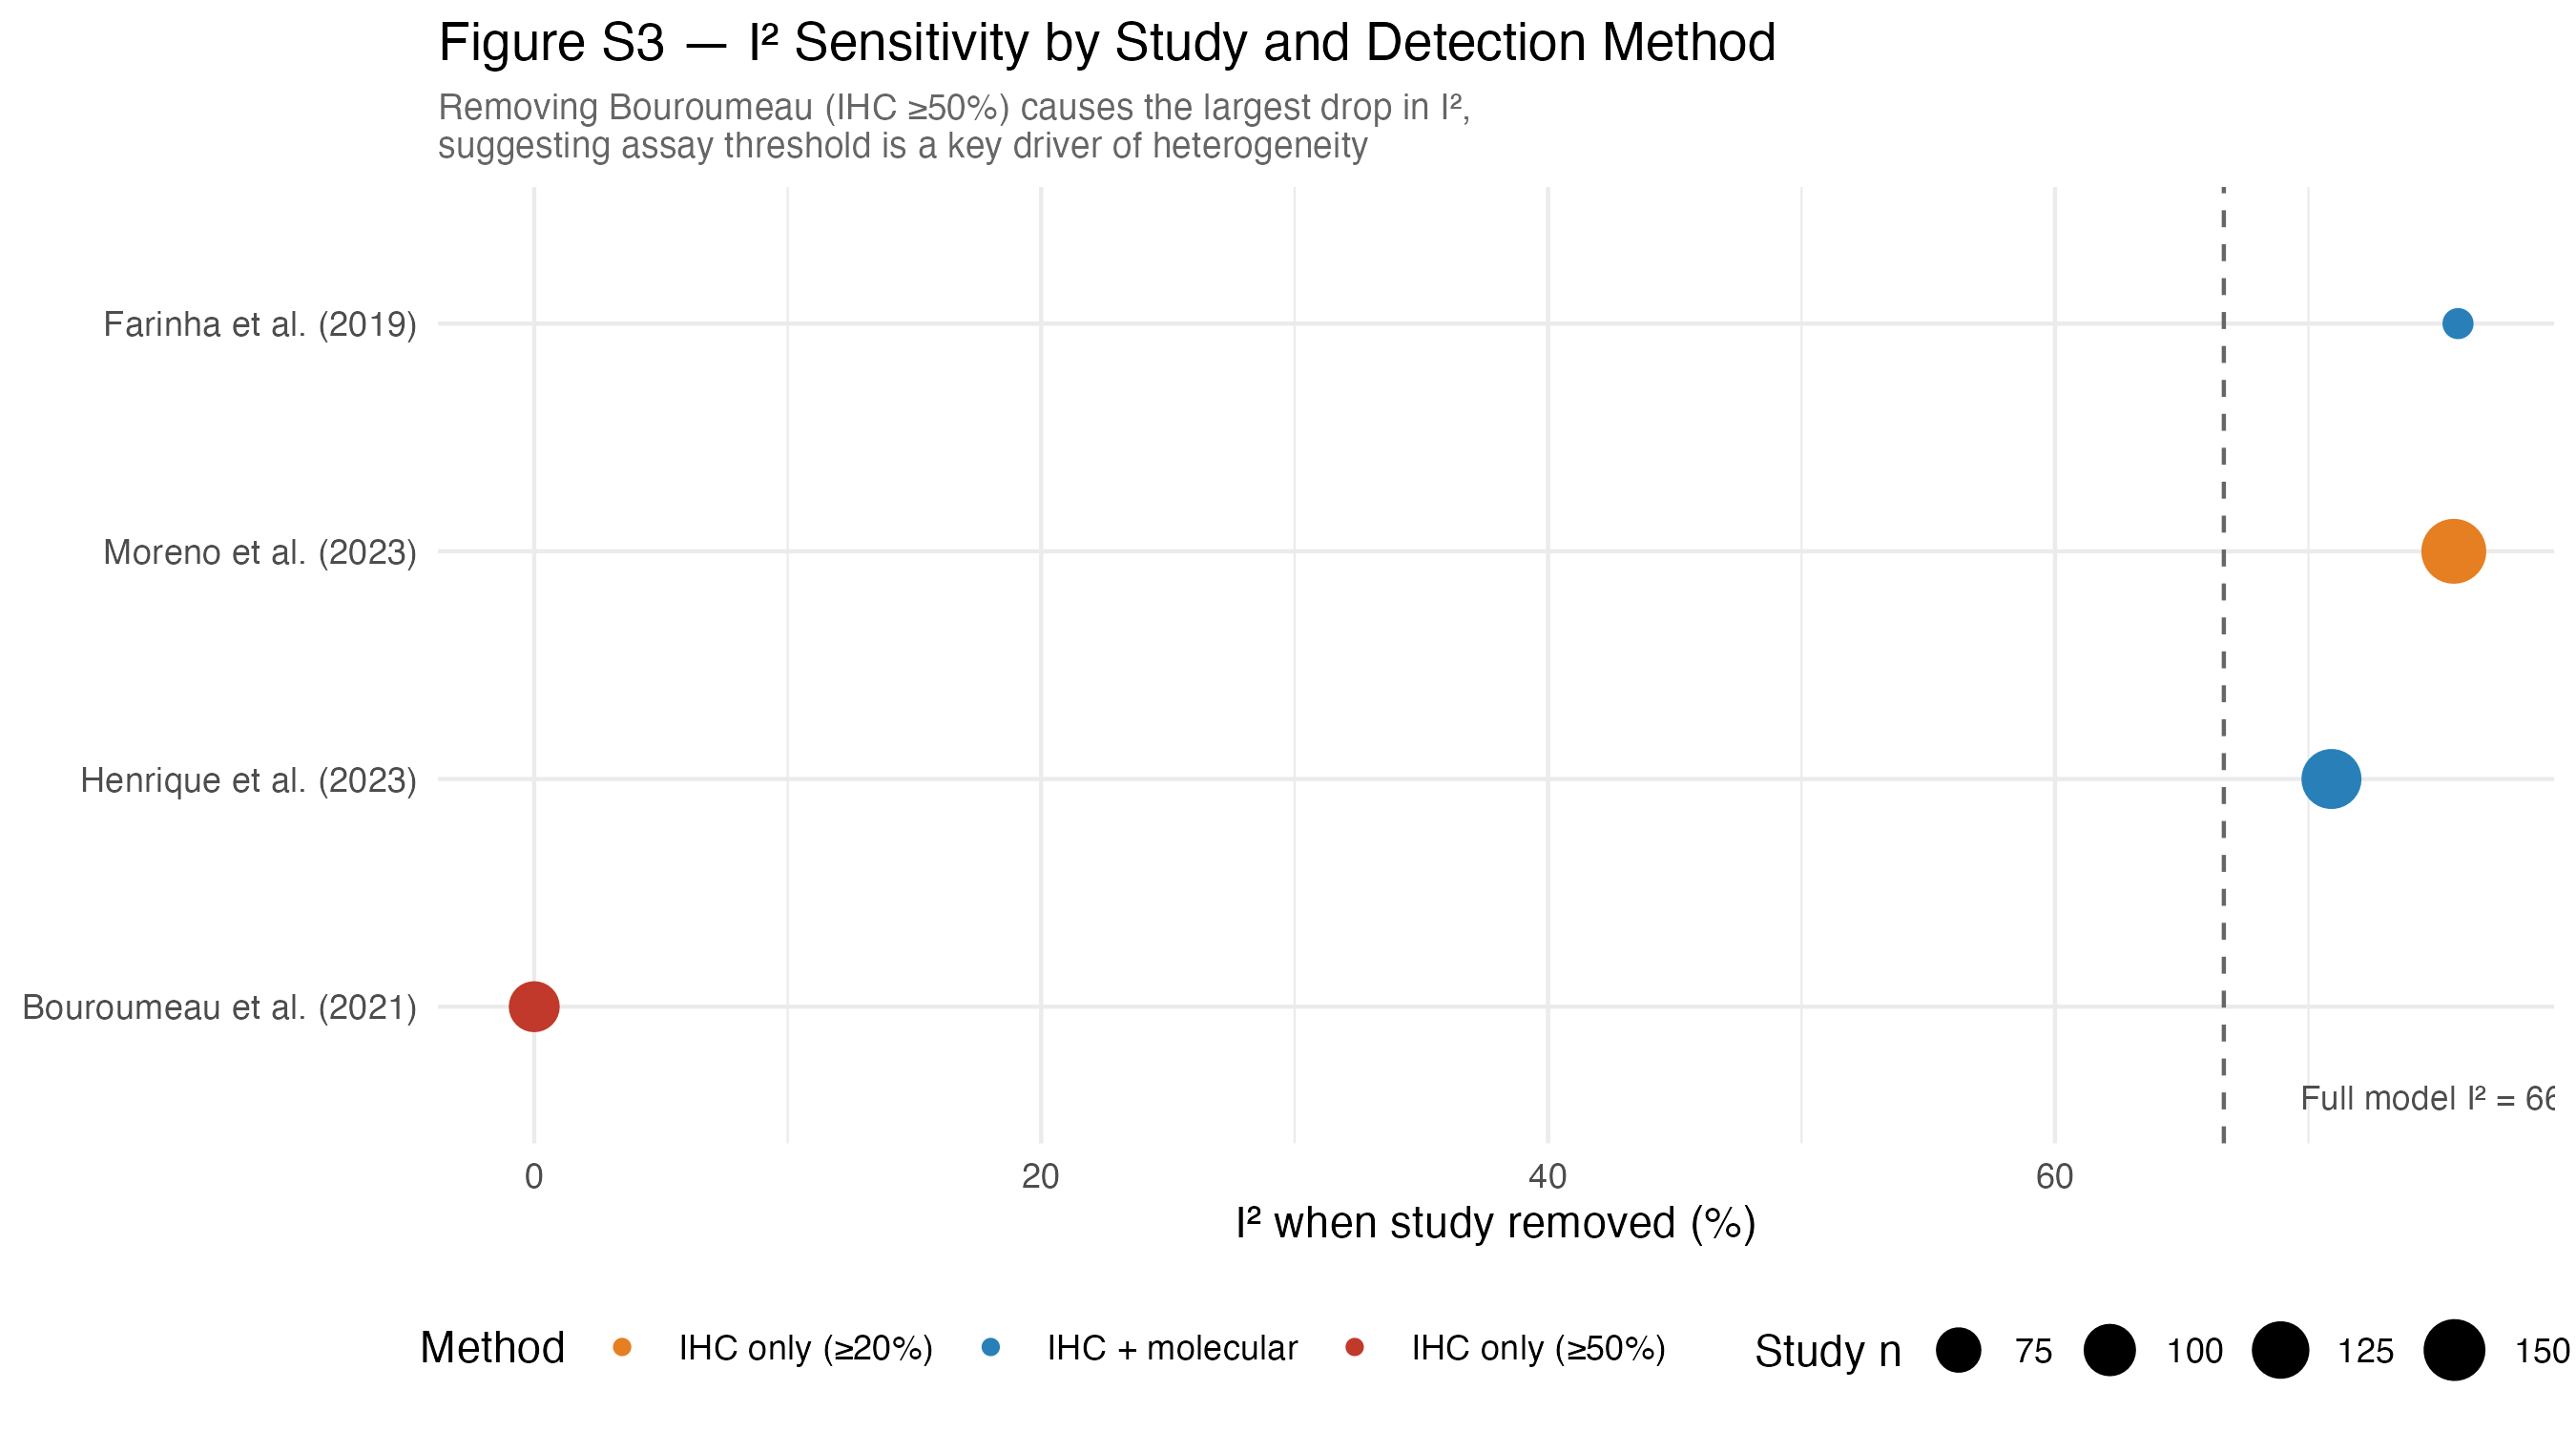


Leave-one-out (LOO) plot of I² when each cohort is removed in turn, stratified by TP53 detection method (IHC vs. sequencing).

### S-Figure 4. IHC-threshold comparison.


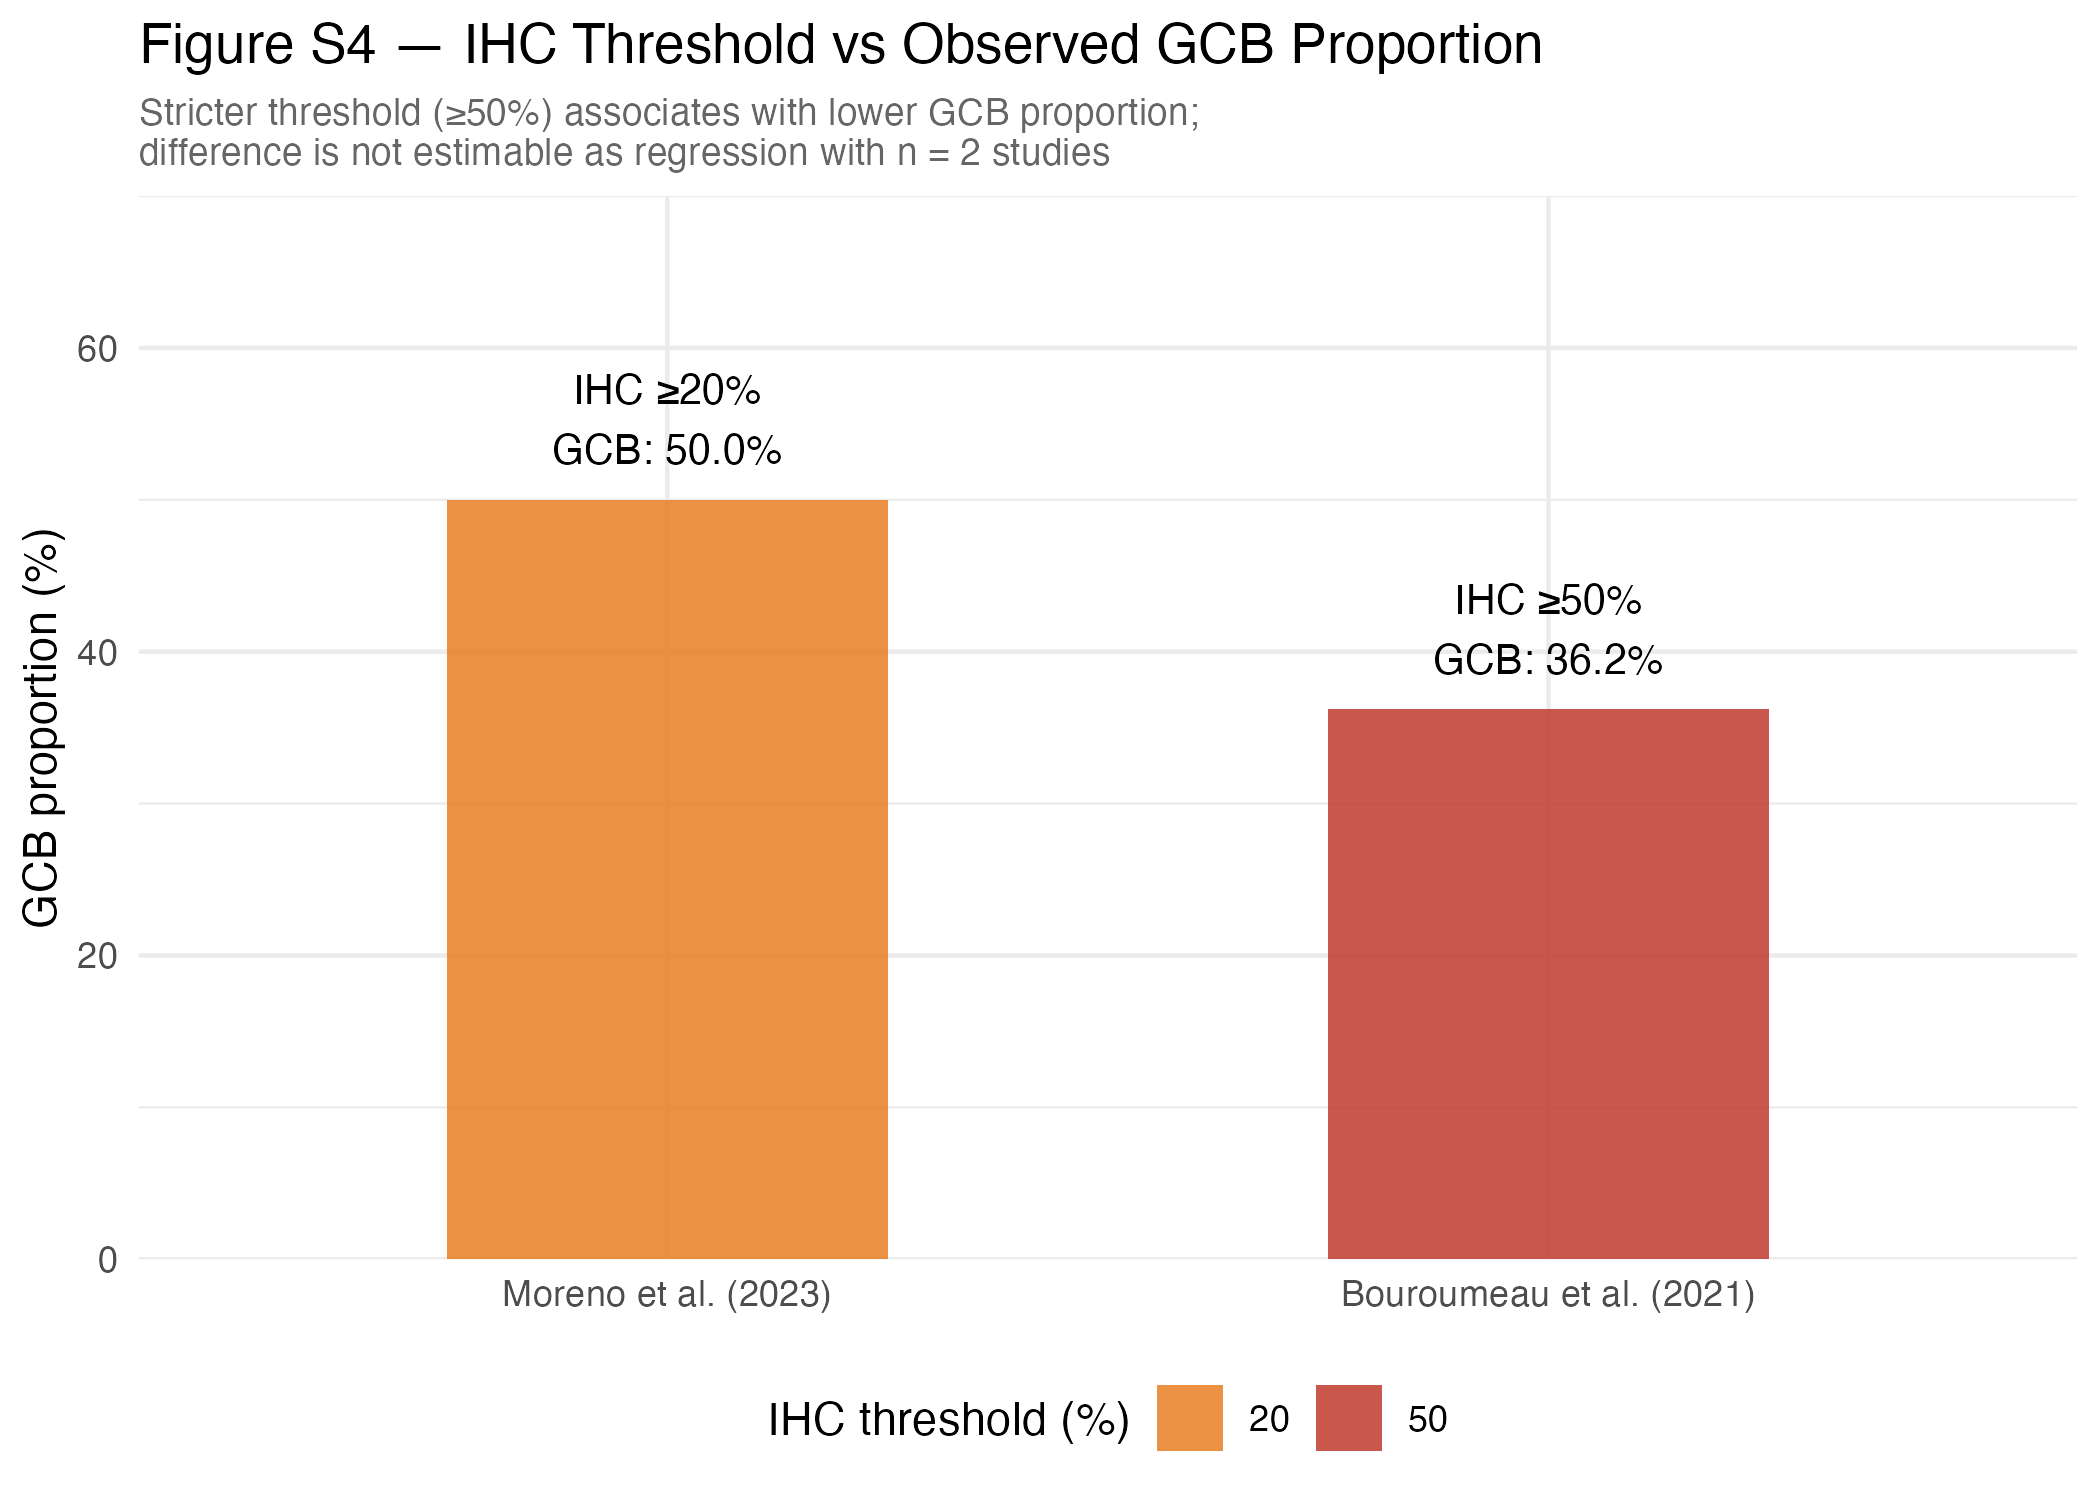


Observed GCB proportions per cohort plotted against the cohort's nominal TP53 IHC positivity threshold (≥10%, ≥20%, ≥50%).

### S-Figure 5. Odds-ratio forest plot for the three full-2×2 cohorts (Henrique, Moreno, Jing).


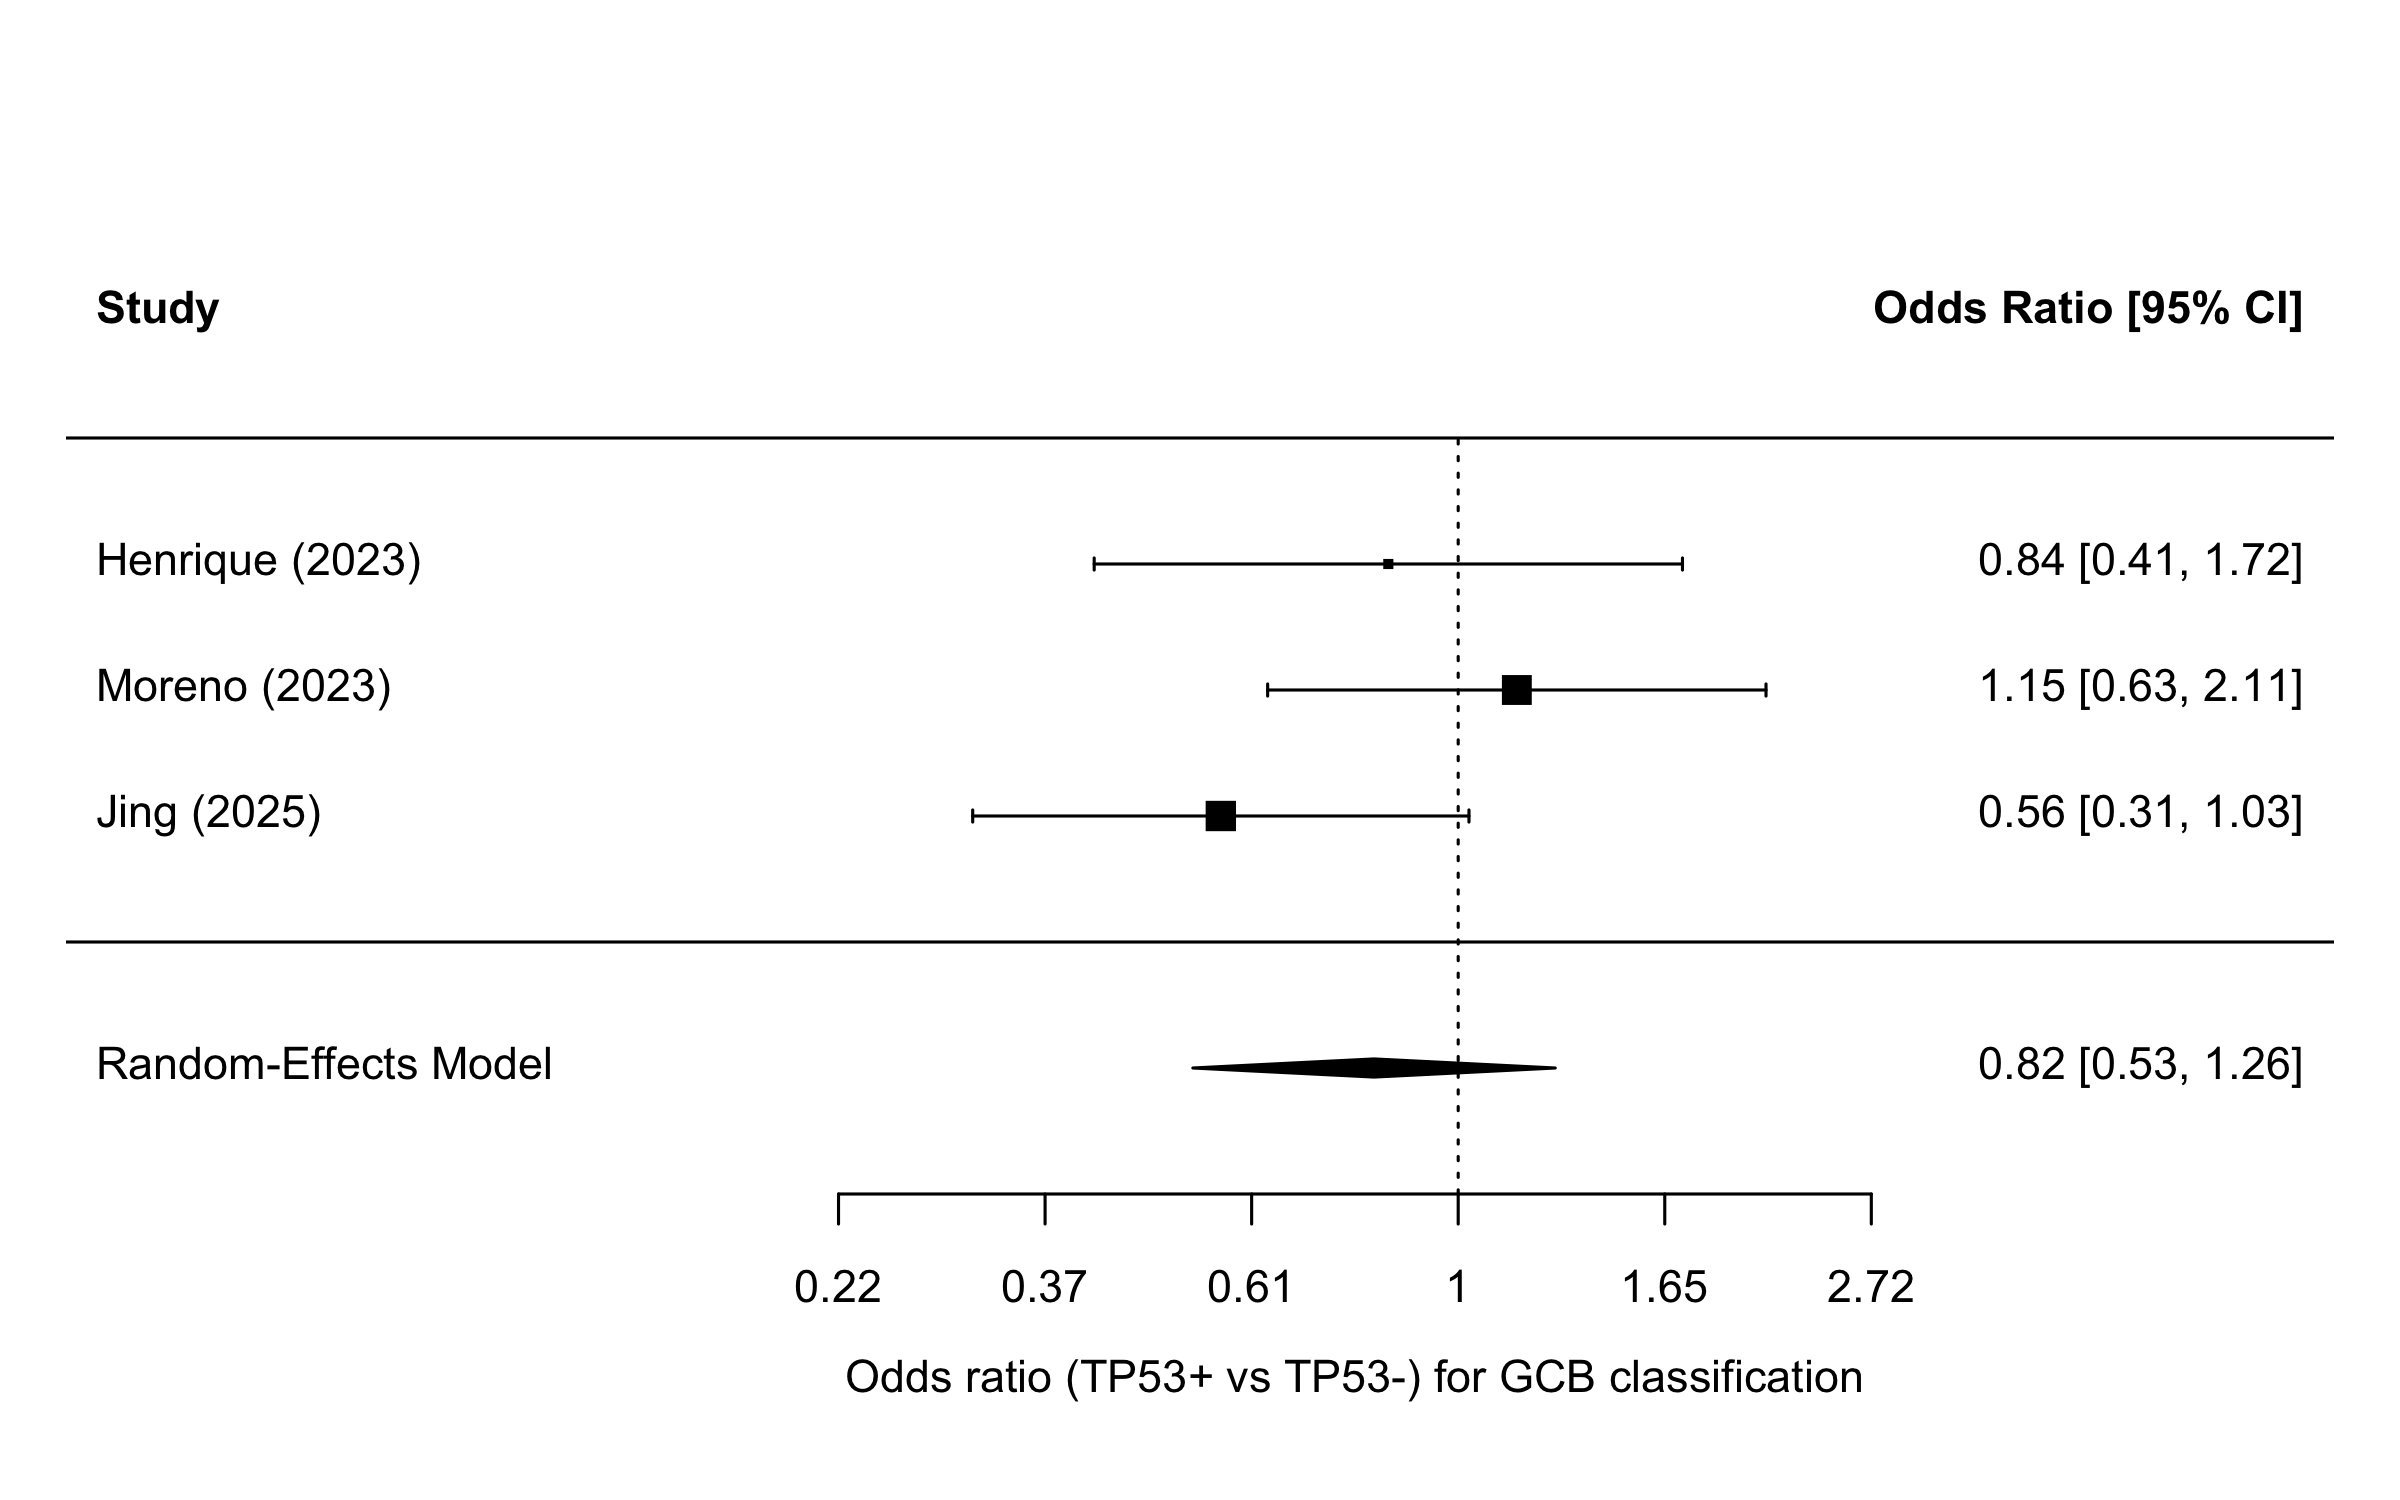


Random-effects pooled log-odds-ratio for the association between TP53 positivity and GCB classification (k = 3 cohorts for which the full 2×2 cross-tabulation is reported in the source paper).

## Section S2. Supplementary Tables

### S-Table 1. Full posterior-summary tables per prior on τ.

Posterior mean, SD, 2.5 / 50 / 97.5 percentiles, effective sample size (n_eff), and rank-normalized R̂ for each of the seven Bayesian parameters (μ, τ, p_overall, and the five study-specific p_i), across all four prior specifications on τ.

| **Prior_tau** | **Parameter** | **Mean** | **SD** | **Q2.5** | **Q50** | **Q97.5** | **n_eff** | **Rhat** |
| --- | --- | --- | --- | --- | --- | --- | --- | --- |
| HalfCauchy_05 | mu | 0.009 | 0.166 | -0.346 | 0.013 | 0.339 | 1854 | 1.001 |
| HalfCauchy_05 | tau | 0.272 | 0.195 | 0.023 | 0.236 | 0.737 | 1396 | 1.002 |
| HalfCauchy_05 | p_overall | 0.502 | 0.041 | 0.414 | 0.503 | 0.584 | 1868 | 1.001 |
| HalfCauchy_05 | p[1] | 0.43 | 0.055 | 0.317 | 0.432 | 0.525 | 2805 | 1.001 |
| HalfCauchy_05 | p[2] | 0.535 | 0.035 | 0.472 | 0.534 | 0.607 | 6023 | 1 |
| HalfCauchy_05 | p[3] | 0.525 | 0.035 | 0.458 | 0.523 | 0.599 | 7141 | 1 |
| HalfCauchy_05 | p[4] | 0.502 | 0.032 | 0.437 | 0.503 | 0.565 | 8417 | 1.001 |
| HalfCauchy_05 | p[5] | 0.524 | 0.033 | 0.463 | 0.522 | 0.592 | 7819 | 1 |
| HalfCauchy_10 | mu | 0.005 | 0.18 | -0.379 | 0.012 | 0.359 | 1933 | 1.002 |
| HalfCauchy_10 | tau | 0.322 | 0.231 | 0.024 | 0.278 | 0.908 | 1264 | 1.003 |
| HalfCauchy_10 | p_overall | 0.501 | 0.044 | 0.406 | 0.503 | 0.589 | 1938 | 1.002 |
| HalfCauchy_10 | p[1] | 0.422 | 0.056 | 0.314 | 0.422 | 0.524 | 2174 | 1.001 |
| HalfCauchy_10 | p[2] | 0.538 | 0.036 | 0.471 | 0.536 | 0.611 | 5888 | 1 |
| HalfCauchy_10 | p[3] | 0.527 | 0.036 | 0.46 | 0.526 | 0.599 | 6892 | 1 |
| HalfCauchy_10 | p[4] | 0.502 | 0.033 | 0.436 | 0.502 | 0.565 | 9361 | 1 |
| HalfCauchy_10 | p[5] | 0.525 | 0.034 | 0.461 | 0.524 | 0.594 | 6955 | 1 |
| HalfNormal_1 | mu | 0.003 | 0.189 | -0.4 | 0.016 | 0.358 | 1122 | 1 |
| HalfNormal_1 | tau | 0.317 | 0.226 | 0.021 | 0.274 | 0.913 | 1214 | 1.002 |
| HalfNormal_1 | p_overall | 0.501 | 0.046 | 0.401 | 0.504 | 0.589 | 1145 | 1 |
| HalfNormal_1 | p[1] | 0.422 | 0.057 | 0.312 | 0.422 | 0.525 | 2145 | 1 |
| HalfNormal_1 | p[2] | 0.537 | 0.036 | 0.472 | 0.534 | 0.612 | 5918 | 1 |
| HalfNormal_1 | p[3] | 0.527 | 0.036 | 0.459 | 0.525 | 0.602 | 6898 | 1 |
| HalfNormal_1 | p[4] | 0.502 | 0.033 | 0.433 | 0.502 | 0.567 | 8646 | 1 |
| HalfNormal_1 | p[5] | 0.524 | 0.033 | 0.461 | 0.523 | 0.591 | 7610 | 1 |
| Exponential_1 | mu | 0.011 | 0.169 | -0.355 | 0.017 | 0.331 | 1883 | 1.004 |
| Exponential_1 | tau | 0.29 | 0.212 | 0.018 | 0.25 | 0.802 | 1376 | 1.001 |
| Exponential_1 | p_overall | 0.503 | 0.042 | 0.412 | 0.504 | 0.582 | 1888 | 1.004 |
| Exponential_1 | p[1] | 0.426 | 0.057 | 0.315 | 0.428 | 0.527 | 2751 | 1 |
| Exponential_1 | p[2] | 0.536 | 0.036 | 0.469 | 0.535 | 0.608 | 6277 | 1 |
| Exponential_1 | p[3] | 0.526 | 0.036 | 0.458 | 0.525 | 0.601 | 7448 | 1 |
| Exponential_1 | p[4] | 0.502 | 0.033 | 0.435 | 0.503 | 0.567 | 8998 | 1 |
| Exponential_1 | p[5] | 0.524 | 0.033 | 0.463 | 0.523 | 0.592 | 6846 | 1.001 |

### S-Table 2. JBI Prevalence Studies (k = 5 prevalence analysis) and QUIPS (k = 3 OR sub-analysis) risk-of-bias assessment.

Each NOS item from the main-manuscript risk-of-bias table is mapped to the corresponding item on the JBI Prevalence Studies Checklist (J1–J9) for the k = 5 prevalence analysis and to the six QUIPS domains (D1–D6) for the k = 3 odds-ratio sub-analysis. Cohorts that lost the NOS Follow-up star are scored Unclear (U) on JBI item 9 (response rate / non-response handling); all five cohorts meet items 1–8 by construction (peer-reviewed DLBCL cohorts reporting both TP53 status and GCB / non-GCB counts). JBI items: J1 sample frame; J2 sampling; J3 sample size; J4 subject/setting description; J5 coverage; J6 valid identification of condition; J7 standard measurement; J8 appropriate statistical analysis; J9 response rate.

*JBI Prevalence Studies Checklist (k = 5):*

| **Study** | **J1** | **J2** | **J3** | **J4** | **J5** | **J6** | **J7** | **J8** | **J9** | **Yes-count** | **Overall** |
| --- | --- | --- | --- | --- | --- | --- | --- | --- | --- | --- | --- |
| **Bouroumeau (2021)** | Y | Y | Y | Y | Y | Y | Y | Y | U | 8 | Low risk |
| **Hu (2019)** | Y | Y | Y | Y | Y | Y | Y | Y | Y | 9 | Low risk |
| **Henrique (2023)** | Y | Y | Y | Y | Y | Y | Y | Y | U | 8 | Low risk |
| **Moreno (2023)** | Y | Y | Y | Y | Y | Y | Y | Y | Y | 9 | Low risk |
| **Jing (2025)** | Y | Y | Y | Y | Y | Y | Y | Y | Y | 9 | Low risk |

QUIPS domains: D1 study participation; D2 study attrition; D3 prognostic-factor measurement (TP53 IHC / sequencing); D4 outcome measurement (COO via Hans algorithm); D5 study confounding; D6 statistical analysis and reporting.

*QUIPS risk-of-bias (k = 3 OR sub-analysis):*

| **Study** | **D1 Participation** | **D2 Attrition** | **D3 Prognostic factor (TP53)** | **D4 Outcome (COO)** | **D5 Confounding** | **D6 Stats/Reporting** | **Overall** |
| --- | --- | --- | --- | --- | --- | --- | --- |
| **Henrique (2023)** | Low | Moderate | Low | Low | Moderate | Low | Low–Moderate |
| **Moreno (2023)** | Low | Low | Low | Low | Moderate | Low | Low |
| **Jing (2025)** | Low | Low | Low | Low | Moderate | Low | Low |

### S-Table 3. PRISMA-2020 excluded-studies-with-reasons list.

Records considered at title/abstract or full-text stage of the PRISMA-2020 screening flow that were excluded, together with the documented reason for exclusion. The list includes, at minimum, the records named in the main text.

| **Excluded study** | **Year** | **Stage of exclusion** | **Reason for exclusion** |
| --- | --- | --- | --- |
| **Xu-Monette et al.** | 2012 | Full-text | Out-of-window (pre-2018 cutoff). |
| **Landsburg et al.** | 2023 | Full-text | Cohort lacked GCB / non-GCB classification (DLBCL not stratified by cell-of-origin). |
| **Sang et al.** | 2021 | Title/abstract | ASH conference abstract; full TP53 × COO joint table not reported in any associated publication. |
| **Li et al.** | 2023 | Full-text | TP53 status not reported (cohort characterized by MYC/BCL2 only). |
| **Qin et al.** | 2022 | Full-text | No GCB / non-GCB subgroup tabulation; pooled DLBCL only. |
| **Song et al.** | 2021 | Full-text | TP53 ↔ COO joint table not reported; only marginal frequencies shown. |
| **Farinha et al.** | 2019 | Full-text | ASH conference abstract; full joint TP53 × COO table not available in any peer-reviewed publication (excluded from the present revision; previously included in v1). |

## Section S3. Stan model code (all four prior variants)

Two reference Stan source files are provided. The four prior variants on τ reported in the main text — Half-Cauchy(0, 0.5) [primary], Half-Cauchy(0, 1.0), Half-Normal(0, 1), and Exponential(1) — are obtained from the same canonical binomial-logit hierarchical template by changing only the τ prior line; the remaining model code (likelihood, non-centered parameterization, generated quantities for posterior predictive replicates) is identical across variants.

*PD-L1.stan — canonical hierarchical model with weakly informative Half-Cauchy(0, 0.5) prior on the between-study heterogeneity scale (the primary specification in the main text):*

data {

int<lower=1> N; // number of studies

int<lower=0> y[N]; // number of GCB cases

int<lower=0> n[N]; // total cases

}

parameters {

real<lower=0, upper=1> pi; // true underlying prevalence

real mu_logit; // logit of mean detection rate

real<lower=0> phi; // precision (heterogeneity)

vector[N] z; // standard normal for non-centered DR

}

transformed parameters {

real<lower=0, upper=1> mu;

vector<lower=0, upper=1>[N] DR; // study-specific detection rates

vector<lower=0, upper=1>[N] p; // observed prevalence

mu = inv_logit(mu_logit);

for (i in 1:N) {

real alpha = mu * phi;

real beta = (1 - mu) * phi;

real mean = alpha / (alpha + beta);

real beta_var = (alpha * beta) / ((alpha + beta)^2 * (alpha + beta + 1));

// non-centered reparameterization of beta distribution

real sd = sqrt(beta_var);

real raw = mean + sd * z[i];

DR[i] = fmin(fmax(raw, 1e-6), 1 - 1e-6); // constrain to (0,1)

p[i] = pi * DR[i];

}

}

model {

// Priors

pi ~ beta(2, 2);

mu_logit ~ normal(0, 1);

phi ~ normal(2, 1); // weakly informative, positive-only

z ~ normal(0, 1); // non-centered

// Likelihood

y ~ binomial(n, p);

}

generated quantities {

int y_rep[N];

for (i in 1:N) {

y_rep[i] = binomial_rng(n[i], p[i]);

}

}

*PD-L1-uniform.stan — alternative parameterization with a Uniform(0, 1) prior on the underlying prevalence π and the same non-centered binomial-logit likelihood. Used in conjunction with the Half-Normal(0, 1) and Exponential(1) τ priors as a sensitivity check on the marginal prior on the pooled rate.*

data {

int<lower=1> N; // number of studies

int<lower=0> y[N]; // number of GCB cases

int<lower=0> n[N]; // total cases

}

parameters {

real<lower=0, upper=1> pi; // true underlying prevalence

real mu_logit; // logit of mean detection rate

real<lower=0> phi; // precision (heterogeneity)

vector[N] z; // standard normal for non-centered DR

}

transformed parameters {

real<lower=0, upper=1> mu;

vector<lower=0, upper=1>[N] DR; // study-specific detection rates

vector<lower=0, upper=1>[N] p; // observed prevalence

mu = inv_logit(mu_logit);

for (i in 1:N) {

real alpha = mu * phi;

real beta = (1 - mu) * phi;

real beta_mean = alpha / (alpha + beta);

real beta_var = (alpha * beta) / ((alpha + beta)^2 * (alpha + beta + 1));

// non-centered reparameterization

real sd = sqrt(beta_var);

real raw = beta_mean + sd * z[i];

DR[i] = fmin(fmax(raw, 1e-6), 1 - 1e-6); // keep in (0,1)

p[i] = pi * DR[i];

}

}

model {

// PRIOR: Uniform for pi

pi ~ beta(1, 1); // Uniform(0,1)

mu_logit ~ normal(0, 1); // Prior for detection mean (logit scale)

phi ~ normal(2, 1); // Prior for detection precision

z ~ normal(0, 1); // Non-centered standard normal

// Likelihood

y ~ binomial(n, p);

}

generated quantities {

int y_rep[N];

for (i in 1:N)

y_rep[i] = binomial_rng(n[i], p[i]);

}
